# Supplementary material
Source: PubMed Central journal article supplement (PMC7008371)
Supplement: supp_RA119.011635_156720_3_supp_451029_q3hvtt.pdf [file supp_RA119.011635_156720_3_supp_451029_q3hvtt.pdf]

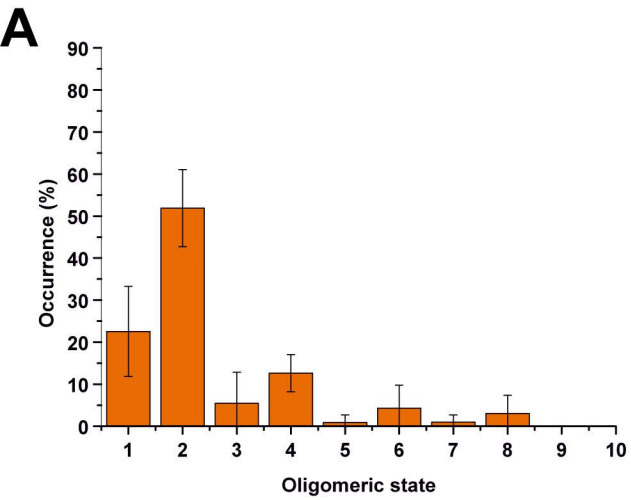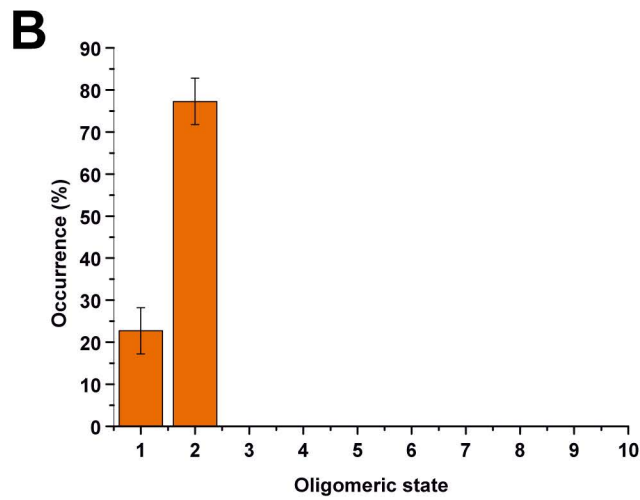

**Figure S1**

**Figure S1. BAX oligomer assay in supported lipid bilayers was not affected by BAX labeling efficiency.**

Percentages of different oligomeric species for BAX-488 (A) and BAXG179P-488 (B) particles calculated as in Fig. 2E and G, respectively, after correction for labeling efficiency (80% for BAX-488 and 50% for BAXG179P-488). Correction for labeling efficiency is a theoretical calculation that estimates the number of molecules per particle based on the percentage of labeling. The larger the amount of unlabeled protein, the higher the uncertainty in the calculation, which is not optimal for low labeling (as is the case for G179P variant) and the numbers after the correction are frequently inaccurate. Raw data are more reliable information in such cases. The corrected data for BAX WT and G179P variant shown here, however, do not change our conclusion based on the non-corrected data in Fig. 2.
